# Supplementary material for: The Antarctic stratospheric Nitrogen Hole: Southern Hemisphere and Antarctic springtime total nitrogen dioxide and total ozone variability as observed in Sentinel-5p TROPOMI data
Source: Copernicus journal article supplement (doi:10.5194/egusphere-2023-2384), 2023-10-25
Supplement: Supplementary file [file egusphere-2023-2384-AC1-supplement.pdf]

Citation: <https://doi.org/10.5194/egusphere-2023-2384-RC1>

## **RC1**

A Review of “The Antarctic stratospheric Nitrogen Hole: Southern Hemisphere and Antarctic springtime total nitrogen dioxide and total ozone variability as observed in Sentinel-5p TROPOMI data” by A. de Laat et al.

### **General Comments**

This paper describes a new analysis of stratospheric “Nitrogen Hole” using TROPOMI nitrogen dioxide (NO<sub>2</sub>) data and assimilated ozone (O<sub>3</sub>) data. The analysis idea is somewhat new and found some new aspects on springtime cross-vortex chemistry/dynamics on NO<sub>2</sub> and O<sub>3</sub>. However, since the stratospheric photochemical lifetime of NO<sub>2</sub> (10-100 s) is much shorter than that of HNO<sub>3</sub> (105-106 s), special care is needed to treat the stratospheric NO<sub>2</sub> data. The authors need to more carefully treat this point in the paper, as is pointed out in the following comments. When the modification of these points is completed in the paper, I think that the paper is worth published in Atmospheric Chemistry and Physics.

**Response:** we thank the referee for the review efforts and the comments that have helped improve the paper. Below follows a detailed response to the comments including for each comment a description of the modifications that have been made.

### **Major Comments**

1) P.6, L.160: The authors first tried to validate the TROPOMI SNO<sub>2</sub> data with ground-based SAOZ data. However, the TROPOMI SNO<sub>2</sub> data are acquired at 13:30 local time, while SAOZ data are acquired at local sunrise. The authors claim that “a diurnal cycle correction is applied based on model calculations”. Since this is a critical point for comparison, more detailed description is needed for this “diurnal cycle correction”.

**Action:** we added this literal quote from Compernelle et al. [2021] that is also in Lambert et al. [2023]:

“the SAOZ measurements are adjusted to the TROPOMI overpass time using a model-based factor. This is calculated with the PSCBOX 1D stacked-box photochemical model (Errera and Fonteyn, 2001; Hendrick et al., 2004), initiated with daily fields from the SLIMCAT chemistry transport model (CTM). The amplitude of the adjustment depends strongly on the effective SZA assigned to the ZSL-DOAS measurements; it is taken here to be 89.5°. The uncertainty related to this adjustment is of the order of 10 %. To reduce mismatch errors due to the significant horizontal smoothing differences between TROPOMI and SAOZ measurements, TROPOMI SNO<sub>2</sub> values (from ground pixels at high resolution) are averaged over the air mass footprint where ground-based zenith-sky measurements are sensitive.”

2) If ascending node crossing local time of Sentinel-5P is 13:30, the descending node crossing local time is 01:30. However, there is no description on whether the authors are using only ascending part of the orbit, or using both ascending and descending parts (full parts) of the orbit. Since the measurement local time is important for NO<sub>2</sub> analysis, please clarify this point.

**Response:** For this paper all TROPOMI SNO<sub>2</sub> observations that are sufficiently accurate ( $q_a$  value  $> 0.5$ ) are included in the averaging at the  $0.4 \times 0.8$  degree grid. Note that the  $q_a$  value threshold of 0.5 is defined such that effectively only measurements with  $SZA > 81.2$  degrees are excluded. Overall it means that data from ascending and descending orbits are used in the calculation of daily mean TROPOMI SNO<sub>2</sub>. The average is arithmetic without any weighting.

We also added a brief discussion on SNO<sub>2</sub> diurnal cycle effects on both TROPOMI SNO<sub>2</sub> retrievals and validation results. Although this is not expected to materially affect the results of this paper there are clear indications that effects are not marginal. Which supports the need for an assessment of diurnal cycle effects. As we present a more-or-less new SNO<sub>2</sub> application for a region (Polar) that otherwise has been largely ignored there is little information – if any – about diurnal cycle effects. What has been published indicates what effects can be sufficiently large that they cannot be simply ignored but not large enough to materially affect the results presented here.

Note in support that the 10-20% SNO<sub>2</sub> diurnal cycle adjustment effects reported in Dubé et al. [2021] are consistent with the SAOZ 10% SNO<sub>2</sub> diurnal cycle correction effects mentioned in Compennolle et al. [2021].

**Action:** the following was added to the discussion section 4.

“In addition, although the diurnal cycle in SNO<sub>2</sub> is relatively small compared to its seasonal cycle it nevertheless can affect satellite retrievals and validation results. Dube et al. [2021] reported order of magnitude 10-20% effects for SAGE III/ISS solar occultation limb retrievals with larger effects for higher latitudes. Although their results are not one-on-one applicable to the results presented here they clearly indicate the need for properly assessing diurnal cycle effects on TROPOMI SNO<sub>2</sub> measurements and validation.”

We also added the following to the end of section 2.1.

“A  $q_u$  value  $> 0.5$  excludes any TROPOMI observation with a solar zenith angle  $> 81.2^\circ$ . During the Antarctic summer this leads to some observations from the descending TROPOMI orbit over Antarctic to be include in the daily average (TROPOMI orbits the sunlit part of the earth from south to north).”

3) The authors use the term “Noxon cliff” for both the cliff for NO<sub>2</sub> and that of O<sub>3</sub>. However, as far as I understand, the “Noxon cliff” can be used only for the cliff of nitrogen species (NO<sub>x</sub>, HNO<sub>3</sub>, N<sub>2</sub>O<sub>5</sub>, etc.), but not for O<sub>3</sub>. Therefore, all the description after Section 3.4, where the authors use the terminology “Noxon cliff for TCO<sub>3</sub>” should be re-worded.

**Response:** we agree, originally the Noxon cliff was indeed associated with nitrogen oxides and the strong-cross-vortex-edge gradient that was observed in nitrogen oxides. We do want to note in passing that several subsequent publications have connected the Noxon cliff to similar cross vortex trace gas gradients observed for other trace gases. Which should not surprise anyone as there are other trace gases involved in the catalytic ozone destruction cycle that will show strong similar gradients (HO<sub>x</sub>, ClO<sub>x</sub> or BRO<sub>x</sub> cycle gases) while the mixing barrier across the winter vortex may also lead to significant gradients in other trace gases not involved in catalytic ozone destruction cycles.

**Action:** changed the description to “cross-vortex TCO<sub>3</sub> gradient” (or similar) and checked/ensured that the use of the phrase “Noxon cliff” was exclusively used in conjunction with stratospheric nitrogen cycle trace gases.

### Minor Comments

4) P.6, Figure 1A: Please explain why there are differences in darkness both in S5p total NO<sub>2</sub> data points and reference total NO<sub>2</sub> data points in this plot.

**Response:** the data points are semi-transparent circles (with darker outline) to provide the reader with some idea of where TROPOMI and SAOZ data overlap. Due to the strong seasonal cycle and relatively small differences between both datasets points frequently overlap. The plots on the S5p VDAF server consist of non-transparent filled markers. This has the consequence that many data points become invisible - either overlapping data points from the same instrument or overlapping TROPOMI and SAOZ data points. We thought that using semi-transparent data points was visually a bit more appealing. The consequence is that overlapping data points will show up with a different transparency. Note that for each SAOZ data point there is a corresponding TROPOMI data point.

**Action:** We added a clarification to the figure caption.

5) P.6, Figure 1B: There is no explanation on different three regression lines. Please explain them either in caption or in the legend. Also, no color bar is shown in the figure. Please add a color bar.

**Response:** we indeed forgot to describe which line is which (although the color of the value of the regression coefficients provide in the upper left corner of the plot provide a visual clue). The dotted grey line is the 1:1 line, the solid grey line is the Ordinary Linear Regression line, the solid red line is the Orthogonal Distance Regression line.

**Action:** We added a clarification to the figure caption.

6) P.6, Table 1: Why there are relatively large biases (< -10 %) in Rio Gallegos data? Please add some explanation.

**Response:** Comparison between TROPOMI and Pandora total NO<sub>2</sub> column data and separating stations by (tropospheric NO<sub>2</sub>) pollution levels reveals a systematic small positive “bias of +5.8 % for the 28 lower polluted stations and -17.9 % for the 42 higher polluted stations” (ground-based measurements larger than TROPOMI), see Lambert et al. [2023]. This negative bias for polluted stations is consistent with the negative bias for Rio Gallegos and of similar order of magnitude.

Although the Pandora network does not cover high southern latitudes, the possibility exists that Rio Gallegos measurements are affected by air pollution from the city of Rio Gallegos itself (population of approximately 80,000). The location of the SAOZ instrument at “Observatorio Atmosférico de la Patagonia Austral” is west-north-west to the city and bordering the airport (see Google Maps image below). The physical distance to the city border is approximately 5 km and to the city center approximately 10 km, sufficiently nearby for combustion NO<sub>2</sub> from the city to affect the SAOZ observations.

The validation report by Lambert et al. [2023] does not find biases due to the satellite solar zenith angle (SZA), the satellite cloud fraction and satellite surface albedo large enough to explain the relatively large bias for Rio Gallegos. Note that Lambert et al. [2023] does not specifically discuss comparisons for individual locations.

An analysis of SAOZ NO<sub>2</sub> data at Rio Gallegos by Raponi [2012] reveals that the lower envelope of the NO<sub>2</sub> seasonal cycle is well and sharply defined – suggesting a clean troposphere with the stratospheric seasonal cycle dominating. The upper envelope, however, shows a lot of scatter and spikes – which are absent at clean Southern Hemisphere locations like Neumayer suggesting emission plumes passing over the SAOZ station under favorable conditions. Note that Raponi [2012] does not discuss the causes of these spikes.

Overall, contamination of Rio Gallegos measurements by local tropospheric pollution would be a possible and plausible explanation but would require more research. Note that even with the bias the difference remains within the TROPOMI mission requirement targets.

**Action:** a brief summary/explanation based on the response above was added to section 2.2

### *reference*

*Measurements of NO<sub>2</sub> and O<sub>3</sub> vertical column densities over Río Gallegos, Santa Cruz province, Argentina, using a portable and automatic zenith-sky DOAS system*

*Optica Pura y Aplicada 45(4):397-403*

*DOI:10.7149/OPA.45.4.397*

*[https://www.researchgate.net/publication/272963549\\_Measurements\\_of\\_NO2\\_and\\_O3\\_vertical\\_column\\_densities\\_over\\_Rio\\_Gallegos\\_Santa\\_Cruz\\_province\\_Argentina\\_using\\_a\\_portable\\_and\\_automatic\\_zenith-sky\\_DOAS\\_system](https://www.researchgate.net/publication/272963549_Measurements_of_NO2_and_O3_vertical_column_densities_over_Rio_Gallegos_Santa_Cruz_province_Argentina_using_a_portable_and_automatic_zenith-sky_DOAS_system)*

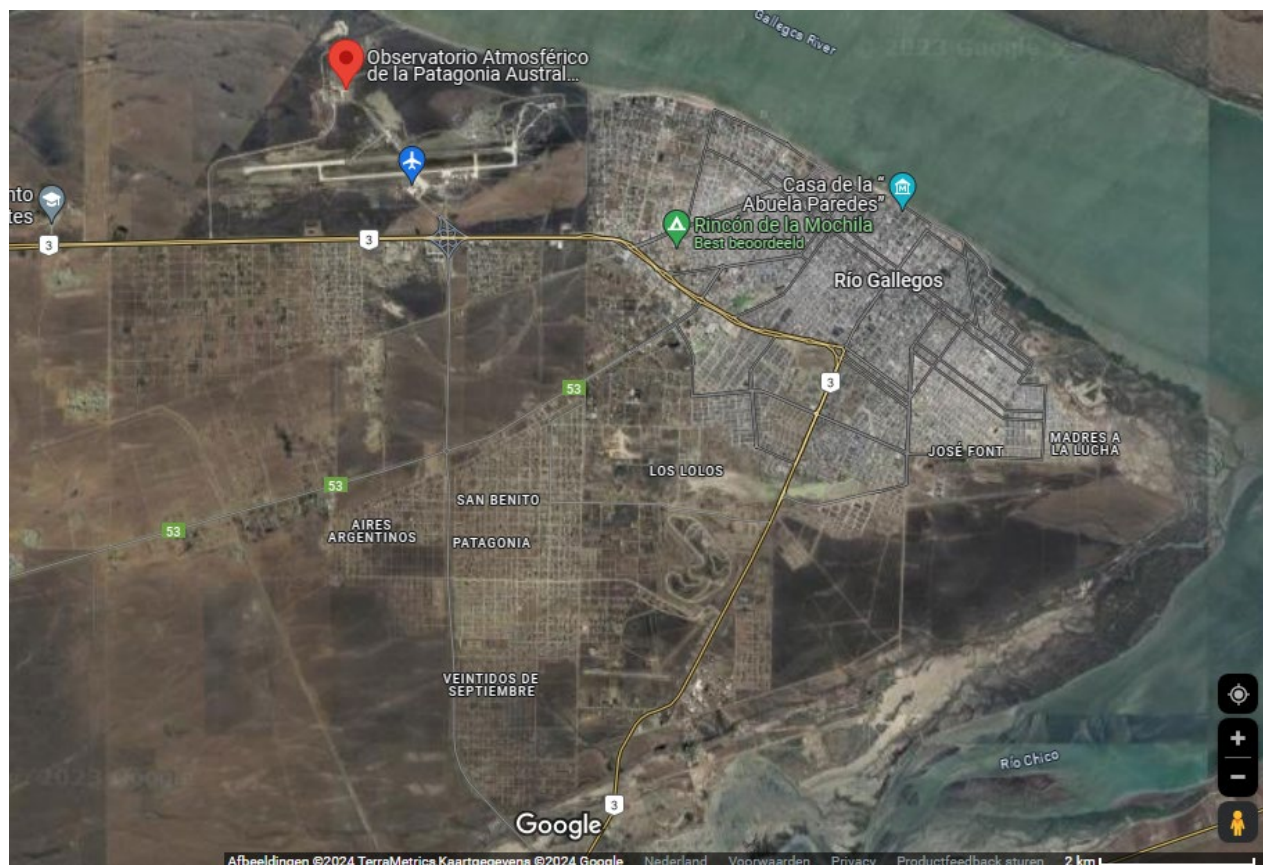

7) P.6, Table 1: The order of stations in the table should be not in alphabetical order, but from lower latitude to higher latitude.

**Action:** changed accordingly

8) P.7, L.195: “MSR-2” first appeared in the text which is not explained elsewhere, nor any reference is shown. Please explain MSR-2 and add some references.

**Action:** a brief description of MSR-2 and some references were added to section 2.3 (Global Ozone field data).

9) P.7, L.197: “TEMIS” first appeared in the text which is not explained elsewhere, nor any reference is shown. Please explain TEMIS and add some references.

**Action:** we removed “TEMIS” and rather refer to the “KNMI operational daily global assimilated TCO<sub>3</sub> field”. We also added that this operational assimilated TCO<sub>3</sub> field is produced for operational daily worldwide UV index predictions and that these TCO<sub>3</sub> analyses and predictions – input for the UV index predictions - are always in real time available – unlike MSR-2 which is updated once a year or so.

10) P.7, L.203: The authors claimed “longitude-latitude grid of 1.5°x1.0° and is re-gridded to 0.8°x0.4° to match ...”. How they re-grid the data into finer resolution grid? Please explain.

**Response:** This is correct, the TCO<sub>3</sub> data is regridded to a finer resolution using a standard bilinear interpolation. Obviously it could have been decided to retain the lower TCO<sub>3</sub> resolution and average the TROPOMI NO<sub>2</sub> data to on that grid. TROPOMI NO<sub>2</sub> data has a much finer resolution (3.5x5.5 km sub-satellite) so the 0.8x0.4 grid already involves an averaging step. The 0.8x0.4 grid is then somewhere between the TROPOMI NO<sub>2</sub> resolution and the TCO<sub>3</sub> resolution. This could have been done differently but each choice comes with its pros and cons. We did, however, check for a single day what results looked like using TROPOMI TCO<sub>3</sub> pixel data – so at a spatial resolution similar to TROPOMI NO<sub>2</sub> – and we did not find significant differences in the overall outcomes (this is mentioned at the end of discussion section 4): “results ... are robust relative to using gridded data or pixel data or even data from different satellites”. Obviously this is a point for further attention in the future but sufficient for the purpose of this paper.

**Action:** we changed this to “re-gridded (bi-linear interpolation) to a finer 0.8 ...”

11) P.7, L.205: “GOME-2 has a 4 DU bias”. Is this a positive bias or a negative bias? Please explain.

**Response:** The bias (offset) is positive relative to ground-based observations (see van der A et al., 2015)

**Action:** the text was modified accordingly

12) P.8, Figure 4: The panel for 2020 is wrong (the one shown here is for 2019). Please add a panel for 2020.

**Action:** figure was updated

13) P.8, Figure 5: Please add panel numbers [A]-[F] in Figure 5. In the figure caption, use [A]-[F] for the corresponding explanation.

**Action:** figure was updated and the text modified accordingly

### **Grammar/Typos**

**Action:** all grammar issues and typos have been changed accordingly

14) P.1, L.28: This process depletes the Antarctic ... --> This process depletes nitrogen oxides (denitrification/denoxification) in the Antarctic stratospheric vortex (Farman ...

15) P.2, L.29: Farman et al., 1995 --> Farman et al., 1985

16) P.2, L.31: during Antarctic spring to the then denitrified ... --> during Antarctic spring to the denitrified ...

17) P.2, L.45: Struthers et al 2004 --> Struthers et al., 2004

18) P.6, L.170: regression coefficients equal 0.94 --> regression coefficients equal to 0.94

19) P.11, L.336: And complex relationships between (long-lived) ... --> And complex relationships among (long-lived) ...

20) P.14, L.416: J d.L. --> A.d.L.

21) P.15, L.417: P.V. --> J.P.V.
